# Supplementary material
Source: publisher site journal article supplement (https://www.dovepress.com/article/supplementary_file/560044/560044%20Supplementary%20Material.docx)
Supplement: Supplementary file 1 [file 560044%20Supplementary%20Material.docx]

**Supplemental Table 1. ICD-10 code for variables and complications**

| ICD-10 | Variables |
| --- | --- |
| C00-D49 | Neoplasms |
| I10 | Essential (primary) hypertension |
| C34 | Malignant neoplasm of bronchus and lung |
| F17 | Nicotine dependence |
| J44 | Other chronic obstructive pulmonary disease |
| I20-I25 | Ischemic heart diseases |
| E66 | Overweight and obesity |
| E08-E13 | Diabetes mellitus |
| D64 | Other anemias |
| K70-K77 | Diseases of liver |
| E55 | Vitamin D deficiency |
| G47.33 | Obstructive sleep apnea (adult) (pediatric) |
| I60-I69 | Cerebrovascular diseases |
| N18 | Chronic kidney disease (CKD) |
| F10 | Alcohol related disorders |
| I50 | Heart failure |
| E40-E46 | Malnutrition |
| ICD-10 | Definition of complications |
| A41 | Sepsis |
| J96.0 J96.2 | Acute respiratory failure  Acute and chronic respiratory failure |
| I21 | Acute myocardial infarction |
| I63 | Cerebral infarction |
| N17 | Acute kidney failure |
